# Supplementary material
Source: publisher site journal article supplement (http://kjim.org/upload/media/kjim-2023-184-Supplementary-Table-4.pdf)
Supplement: Supplementary file 1 [file kjim-2023-184-Supplementary-Table-4.pdf]

**Supplementary Table 4. Incidence of metachronous gastric cancer according to characteristics at the time of endoscopic resection of gastric cancer**

| Variable                                   | Total            | Hanaoka et al. [21], 2010 | Han et al. [19], 2011 | Maehata et al. [26], 2012 | Iguchi et al. [22], Moribata et al. [23], 2016 | Kim et al. [25], 2016 | Han et al. [20], 2018 | Oura et al. [27], 2020 | Kato et al. [24], 2021 |
|--------------------------------------------|------------------|---------------------------|-----------------------|---------------------------|------------------------------------------------|-----------------------|-----------------------|------------------------|------------------------|
| Location of gastric cancer                 |                  |                           |                       |                           |                                                |                       |                       |                        |                        |
| Upper                                      | 30/202 (14.9)    | -                         | 3/21 (14.3)           | 2/25 (8.0)                | 6/34 (17.6)                                    | 2/25 (8.0)            | 1/23 (4.3)            | -                      | 16/61 (26.2)           |
| Lower to mid                               | 199/2,293 (8.7)  | -                         | 6/155 (3.9)           | 26/243 (10.7)             | 41/296 (13.9)                                  | 13/232 (5.6)          | 49/542 (9.0)          | -                      | 64/422 (15.2)          |
| Gross type                                 |                  |                           |                       |                           |                                                |                       |                       |                        |                        |
| Elevated                                   | 62/616 (10.1)    | -                         | 1/83 (1.2)            | 11/105 (10.5)             | 17/129 (13.2)                                  | -                     | -                     | -                      | 33/299 (11.0)          |
| Depressed                                  | 95/569 (16.7)    | -                         | 6/21 (28.6)           | 17/163 (10.4)             | 30/201 (14.9)                                  | -                     | -                     | -                      | 42/184 (22.8)          |
| Lauren's classification of cancer          |                  |                           |                       |                           |                                                |                       |                       |                        |                        |
| Intestinal type                            | 75/809 (9.3)     | -                         | -                     | 27/259 (10.4)             | -                                              | -                     | 48/550 (8.7)          | -                      | -                      |
| Diffuse type                               | 2/16 (12.5)      | -                         | -                     | 1/7 (14.3)                | -                                              | -                     | 1/9 (11.1)            | -                      | -                      |
| Differentiation of primary cancer          |                  |                           |                       |                           |                                                |                       |                       |                        |                        |
| Differentiated                             | 62/798 (7.8)     | -                         | -                     | -                         | -                                              | 14/249 (5.6)          | 48/549 (8.7)          | -                      | -                      |
| Undifferentiated                           | 3/24 (12.5)      | -                         | -                     | -                         | -                                              | 1/8 (12.5)            | 2/16 (12.5)           | -                      | -                      |
| Depth of invasion                          |                  |                           |                       |                           |                                                |                       |                       |                        |                        |
| Mucosa                                     | 152/1,468 (10.4) | -                         | -                     | 25/245 (10.2)             | -                                              | 14/240 (5.8)          | 46/513 (9.0)          | -                      | 67/470 (14.3)          |
| Submucosa                                  | 20/105 (19.0)    | -                         | -                     | 3/23 (13.0)               | -                                              | 1/17 (5.9)            | 4/52 (7.7)            | -                      | 12/13 (92.3)           |
| Synchronous gastric cancer                 |                  |                           |                       |                           |                                                |                       |                       |                        |                        |
| Absent                                     | 77/436 (17.7)    | -                         | -                     | -                         | -                                              | -                     | -                     | -                      | 77/436 (17.7)          |
| Present                                    | 10/47 (21.3)     | -                         | -                     | -                         | -                                              | -                     | -                     | -                      | 10/47 (21.3)           |
| Curability of endoscopic treatment (eCura) |                  |                           |                       |                           |                                                |                       |                       |                        |                        |
| Low risk                                   | 38/413 (9.2)     | -                         | -                     | -                         | -                                              | -                     | -                     | 38/413 (9.2)           | -                      |
| Intermediate risk                          | 2/5 (40.0)       | -                         | -                     | -                         | -                                              | -                     | -                     | 2/5 (40.0)             | -                      |
| High risk                                  | 0 (0)            | -                         | -                     | -                         | -                                              | -                     | -                     | 0 (0)                  | -                      |

Values are presented as n/N (%).
